# Supplementary material for: Novel InGaSb/AlP Quantum Dots for Non-Volatile Memories
Source: MDPI journal article supplement (doi:10.3390/nano12213794), 2022-10-27
Supplement: s1 [file s1]

## **Supplementary Materials**

### **Novel InGaSb/AlP quantum dots for non-volatile memories**

Demid S. Abramkin<sup>1,2</sup>, Victor V. Atuchin<sup>3,4,5,6\*</sup>

<sup>1</sup>Laboratory of Molecular Beam Epitaxy of III-V Semiconductor Compounds, Institute of Semiconductor Physics, SB RAS, Novosibirsk 630090, Russia

<sup>2</sup>Department of Physics, Novosibirsk State University, Novosibirsk 630090, Russia

<sup>3</sup>Laboratory of Optical Materials and Structures, Institute of Semiconductor Physics, SB RAS, Novosibirsk 630090, Russia

<sup>4</sup>Research and Development Department, Kemerovo State University, Kemerovo 650000, Russia

<sup>5</sup>Department of Industrial Machinery Design, Novosibirsk State Technical University, Novosibirsk 630073, Russia

<sup>6</sup>R&D Center “Advanced Electronic Technologies”, Tomsk State University, Tomsk 634034, Russia

Corresponding author: [atuchin@isp.nsc.ru](mailto:atuchin@isp.nsc.ru)

**Table S1.** Materials parameters for AlP, GaP, InP, AlSb, GaSb and InSb at 300 K, which were used for the calculations.  $a_0$  – lattice constant,  $C_{11}$ ,  $C_{12}$ ,  $C_{44}$  – elastic constants,  $E_g^{\Gamma,X,L}$  – bandgaps for  $\Gamma$ ,  $X$  and  $L$  valleys,  $a_{\Gamma,X,L,v}$  – hydrostatic deformation potentials for the conduction band edge in  $\Gamma$ ,  $X$  and  $L$  points of the Brillouin zone and valence band,  $b_{X,v}$  – shear deformation potential for the conduction band at  $X$  point of the Brillouin zone and valence band,  $\Delta_0$  – energy of spin-orbital splitting in the valence band,  $VBO$  – valence band offsets,  $m_\Gamma$  – electron effective mass in the  $\Gamma$  point of the Brillouin zone,  $m_X^t$  and  $m_X^l$  – transversal and longitudinal electron effective mass in the  $X$  point of the Brillouin zone,  $m_L^t$  and  $m_L^l$  – transversal and longitudinal electron effective mass in the  $L$  point of the Brillouin zone,  $m_{hh}$ ,  $m_{lh}$ ,  $m_{SO}$  – effective masses for the heavy, light and spin-orbital splitting holes,  $F$  – Kane’s parameter,  $E_P$  – Kane’s matrix element,  $\gamma_{1,2,3}$  – Luttinger parameters for the valence band.

| Parameter         | AlP                 | GaP                 | InP                 | AlSb                | GaSb                | InSb                |
|-------------------|---------------------|---------------------|---------------------|---------------------|---------------------|---------------------|
| $a_0$ , Å         | 5.4672 <sup>a</sup> | 5.4505 <sup>a</sup> | 5.8697 <sup>a</sup> | 6.1355 <sup>a</sup> | 6.0959 <sup>a</sup> | 6.4794 <sup>a</sup> |
| $C_{11}$ , GPa    | 1330 <sup>a</sup>   | 1405 <sup>a</sup>   | 1011 <sup>a</sup>   | 876.9 <sup>a</sup>  | 884.2 <sup>a</sup>  | 684.7 <sup>a</sup>  |
| $C_{12}$ , GPa    | 630 <sup>a</sup>    | 620.3 <sup>a</sup>  | 561 <sup>a</sup>    | 434.1 <sup>a</sup>  | 402.6 <sup>a</sup>  | 373.5 <sup>a</sup>  |
| $C_{44}$ , GPa    | 615 <sup>a</sup>    | 703.3 <sup>a</sup>  | 456 <sup>a</sup>    | 407.6 <sup>a</sup>  | 432.2 <sup>a</sup>  | 311.1 <sup>a</sup>  |
| $E_g^\Gamma$ , eV | 3.552 <sup>a</sup>  | 2.808 <sup>a</sup>  | 1.352 <sup>a</sup>  | 2.300 <sup>a</sup>  | 0.7267 <sup>a</sup> | 0.173 <sup>a</sup>  |
| $E_g^X$ , eV      | 2.487 <sup>a</sup>  | 2.272 <sup>a</sup>  | 2.313 <sup>a</sup>  | 1.616 <sup>a</sup>  | 1.032 <sup>a</sup>  | 0.568 <sup>a</sup>  |
| $E_g^L$ , eV      | 3.537 <sup>a</sup>  | 2.642 <sup>a</sup>  | 1.943 <sup>a</sup>  | 1.895 <sup>a</sup>  | 0.752 <sup>a</sup>  | 0.868 <sup>a</sup>  |
| $a_\Gamma$ , eV   | -6.88 <sup>b</sup>  | -9.41 <sup>b</sup>  | -6.34 <sup>b</sup>  | -8.12 <sup>b</sup>  | -9.33 <sup>b</sup>  | -6.84 <sup>b</sup>  |
| $a_X$ , eV        | 3.98 <sup>b</sup>   | 0.63 <sup>b</sup>   | 0.59 <sup>b</sup>   | 1.91 <sup>b</sup>   | -0.20 <sup>b</sup>  | 1.41 <sup>b</sup>   |
| $a_L$ , eV        | -1.74 <sup>b</sup>  | -4.41 <sup>b</sup>  | -3.41 <sup>b</sup>  | -2.91 <sup>b</sup>  | -4.38 <sup>b</sup>  | -2.20 <sup>b</sup>  |
| $a_v$ , eV        | 2.64 <sup>b</sup>   | -0.58 <sup>b</sup>  | -0.41 <sup>b</sup>  | 0.73 <sup>b</sup>   | -1.32 <sup>b</sup>  | 0.31 <sup>b</sup>   |
| $b_X$ , eV        | 6.75 <sup>c</sup>   | 6.5 <sup>c</sup>    | 3.3 <sup>c</sup>    | 6.0 <sup>c</sup>    | 6.46 <sup>c</sup>   | 4.53 <sup>c</sup>   |
| $b_v$ , eV        | -1.5 <sup>a</sup>   | -1.6 <sup>a</sup>   | -2.0 <sup>a</sup>   | -1.35 <sup>a</sup>  | -2.0 <sup>a</sup>   | -2.0 <sup>a</sup>   |
| $\Delta_0$ , eV   | 0.07 <sup>a</sup>   | 0.08 <sup>a</sup>   | 0.108 <sup>a</sup>  | 0.676 <sup>a</sup>  | 0.76 <sup>a</sup>   | 0.81 <sup>a</sup>   |
| $VBO$ , eV        | -1.74 <sup>a</sup>  | -1.27 <sup>a</sup>  | -0.94 <sup>a</sup>  | -0.41 <sup>a</sup>  | -0.03 <sup>a</sup>  | 0 <sup>a</sup>      |
| $m_\Gamma$        | 0.22 <sup>a</sup>   | 0.13 <sup>a</sup>   | 0.0795 <sup>a</sup> | 0.14 <sup>a</sup>   | 0.039 <sup>a</sup>  | 0.0135 <sup>a</sup> |
| $m_X^t$           | 0.155 <sup>a</sup>  | 0.253 <sup>a</sup>  | 0.88 <sup>a</sup>   | 0.123 <sup>a</sup>  | 0.22 <sup>a</sup>   | 0.22 <sup>c</sup>   |
| $m_X^l$           | 2.68 <sup>a</sup>   | 2.0 <sup>a</sup>    | 0.88 <sup>a</sup>   | 1.357 <sup>a</sup>  | 1.51 <sup>a</sup>   | 1.51 <sup>c</sup>   |
| $m_L^t$           | 0.15 <sup>d</sup>   | 0.15 <sup>a</sup>   | 0.47 <sup>a</sup>   | 0.23 <sup>a</sup>   | 0.10 <sup>a</sup>   | 0.25 <sup>a</sup>   |
| $m_L^l$           | 1.2 <sup>d</sup>    | 1.2 <sup>a</sup>    | 0.47 <sup>a</sup>   | 1.64 <sup>a</sup>   | 1.3 <sup>a</sup>    | 0.25 <sup>a</sup>   |
| $m_{hh}$          | 0.63 <sup>f</sup>   | 0.32 <sup>a</sup>   | 0.85 <sup>f</sup>   | 0.8 <sup>f</sup>    | 0.34 <sup>f</sup>   | 0.26 <sup>f</sup>   |
| $m_{lh}$          | 0.20 <sup>f</sup>   | 0.14 <sup>f</sup>   | 0.089 <sup>f</sup>  | 0.13 <sup>f</sup>   | 0.0447 <sup>f</sup> | 0.0162 <sup>f</sup> |
| $m_{SO}$          | 0.30 <sup>a</sup>   | 0.25 <sup>a</sup>   | 0.21 <sup>a</sup>   | 0.22 <sup>a</sup>   | 0.12 <sup>a</sup>   | 0.11 <sup>a</sup>   |

|            |                    |   |   |   |                    |   |
|------------|--------------------|---|---|---|--------------------|---|
| $F$        | -0.65 <sup>a</sup> | - | - | - | -1.63 <sup>a</sup> | - |
| $E_P$ , eV | 17.7 <sup>a</sup>  | - | - | - | 27.0 <sup>a</sup>  | - |
| $\gamma_1$ | 3.35 <sup>a</sup>  | - | - | - | 13.4 <sup>a</sup>  | - |
| $\gamma_2$ | 0.71 <sup>a</sup>  | - | - | - | 4.7 <sup>a</sup>   | - |
| $\gamma_3$ | 1.23 <sup>a</sup>  | - | - | - | 6.0 <sup>a</sup>   | - |

<sup>a</sup>[33], <sup>b</sup>[80], <sup>c</sup>[79], <sup>d</sup> GaP value, <sup>e</sup> GaSb value, <sup>f</sup> [81].

**Table S2.** Bowing parameters for GaAlP, InGaP, AlInP, GaAlSb, InGaSb, AlInSb, AlSbP, GaSbP and InSbP [33].

| Bowing parameter        | GaAlP | InGaP | AlInP | GaAlSb           | InGaSb | AlInSb | AlSbP | GaSbP | InSbP |
|-------------------------|-------|-------|-------|------------------|--------|--------|-------|-------|-------|
| $a_0, \text{\AA}$       | 0     | 0     | 0     | 0                | 0      | 0      | 0     | 0     | 0     |
| $C_{11}, \text{GPa}$    | 0     | 0     | 0     | 0                | 0      | 0      | 0     | 0     | 0     |
| $C_{12}, \text{GPa}$    | 0     | 0     | 0     | 0                | 0      | 0      | 0     | 0     | 0     |
| $C_{44}, \text{GPa}$    | 0     | 0     | 0     | 0                | 0      | 0      | 0     | 0     | 0     |
| $E_g^\Gamma, \text{eV}$ | 0     | 0.65  | -0.48 | -0.044<br>+1.22x | 0.415  | 0.43   | 2.7   | 2.7   | 1.9   |
| $E_g^X, \text{eV}$      | 0.13  | 0.20  | 0.38  | 0                | 0.33   | 0      | 2.7   | 2.7   | 1.9   |
| $E_g^L, \text{eV}$      | 0     | 1.03  | 0     | 0                | 0.4    | 0      | 2.7   | 2.7   | 1.9   |
| $a_\Gamma, \text{eV}$   | 0     | 0     | 0     | 0                | 0      | 0      | 0     | 0     | 0     |
| $a_X, \text{eV}$        | 0     | 0     | 0     | 0                | 0      | 0      | 0     | 0     | 0     |
| $a_L, \text{eV}$        | 0     | 0     | 0     | 0                | 0      | 0      | 0     | 0     | 0     |
| $a_v, \text{eV}$        | 0     | 0     | 0     | 0                | 0      | 0      | 0     | 0     | 0     |
| $b_X, \text{eV}$        | 0     | 0     | 0     | 0                | 0      | 0      | 0     | 0     | 0     |
| $b_v, \text{eV}$        | 0     | 0     | 0     | 0                | 0      | 0      | 0     | 0     | 0     |
| $\Delta_0, \text{eV}$   | 0     | 0     | -0.19 | 0.3              | 0.1    | 0.25   | 0     | 0     | 0.75  |
| $VBO, \text{eV}$        | 0     | 0     | 0     | 0                | 0      | 0      | 0     | 0     | 0     |
| $m_\Gamma$              | 0     | 0.051 | 0.22  | 0                | 0.0092 | 0      | 0     | 0     | 0     |
| $m_X^t$                 | 0     | 0     | 0     | 0                | 0      | 0      | 0     | 0     | 0     |
| $m_X^l$                 | 0     | 0     | 0     | 0                | 0      | 0      | 0     | 0     | 0     |
| $m_L^t$                 | 0     | 0     | 0     | 0                | 0      | 0      | 0     | 0     | 0     |
| $m_L^l$                 | 0     | 0     | 0     | 0                | 0      | 0      | 0     | 0     | 0     |
| $m_{hh}$                | 0     | 0     | 0     | 0                | 0      | 0      | 0     | 0     | 0     |
| $m_{lh}$                | 0     | 0     | 0     | 0                | 0.011  | 0      | 0     | 0     | 0     |
| $m_{SO}$                | 0     | 0     | 0     | 0                | 0      | 0      | 0     | 0     | 0     |

The critical sizes of SAQDs were obtained by solving of equation (1). It is can be presented in the following form:

$$h_c = \frac{b \cos(\lambda)}{f} \left( 1 + \frac{(1-\nu/4) \ln\left(\frac{h_c}{2b}\right)}{4\pi \cos^2(\lambda)(1+\nu)} \right) \quad (16).$$

In the case of the  $A_xB_{1-x}C_yD_{1-y}$  quaternary alloy, lattice constant mismatch is

$$f = \frac{a_{mat}}{a_0} - 1 = \frac{a_{mat}}{xy \cdot a_{AC} + (1-x)y \cdot a_{BC} + (1-x)(1-y) \cdot a_{BD} + x(1-y) \cdot a_{AD}} - 1 \quad \text{and} \quad \text{Burgers vector}$$

$$\text{magnitude is } b = \frac{a_{0t}}{\sqrt{2}} = \frac{xy \cdot a_{AC} + (1-x)y \cdot a_{BC} + (1-x)(1-y) \cdot a_{BD} + x(1-y) \cdot a_{AD}}{\sqrt{2}}. \quad \text{We solved this}$$

equation by the graphic method, as it is illustrated in the **Figure S1**.

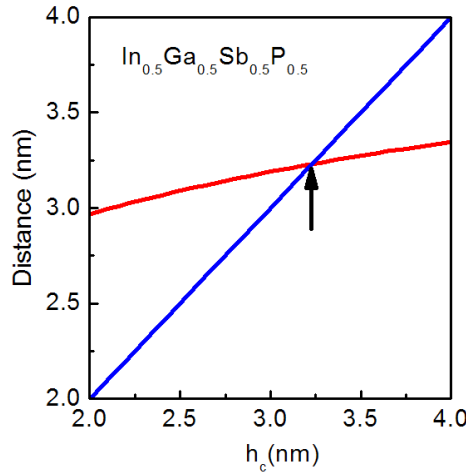

**Figure S1.** Solving of the equation (16) by the graphic method for the case of  $\text{In}_{0.5}\text{Ga}_{0.5}\text{Sb}_{0.5}\text{P}_{0.5}/\text{AIP}$  SAQD. Linear part of the equation depicted by the blue line, the logarithmic one by the red line. The black arrow points to the obtained  $h_c$  value.
